# Supplementary material for: Organic bases catalyze the synthesis of urea from ammonium salts derived from recovered environmental ammonia
Source: Springer Nature journal article supplement (doi:10.1038/s41598-020-59795-6), 2020-02-18
Supplement: 41598_2020_59795_MOESM1_ESM.pdf [file 41598_2020_59795_MOESM1_ESM.pdf]

# Electronic Supplementary Information

for

Organic bases catalyze the synthesis of urea  
from ammonium salts derived from recovered  
environmental ammonia

Yuichi Manaka<sup>1,2,\*</sup>, Yuki Nagatsuka<sup>1</sup>, and Ken Motokura<sup>1</sup>

1. *School of Material and Chemical Technology, Tokyo Institute of Technology*

*4259 Nagatsuta-cho, Midori-ku, Yokohama, Kanagawa, 226-8502 JAPAN*

2. *Renewable Energy Research Center, National Institute of Advanced Industrial*

*Science and Technology*

*2-2-9 Machiikedai, Koriyama, Fukushima, 963-0298 JAPAN*

\*manaka.y.aa@m.titech.ac.jp

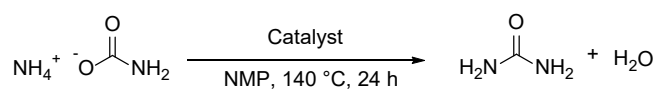

| Entry | Base              | p <i>K</i> <sub>a</sub> values of conjugated acid | Yield (%) |
|-------|-------------------|---------------------------------------------------|-----------|
| 1     | DBU               | 24.3                                              | 18        |
| 2     | TMG               | 23.4                                              | 4         |
| 3     | TBD               | 25.5                                              | 3         |
| 4     | MTBD              | 26.0                                              | 3         |
| 5     | DBN               | 23.4                                              | 3         |
| 6     | Et <sub>3</sub> N | 18.8                                              | Trace     |
| 7     | DMAP              | 18.0                                              | Trace     |
| 8     | Proton sponge     | N/A                                               | Trace     |
| 9     | DABCO             | N/A                                               | Trace     |
| 10    | -                 | -                                                 | Trace     |

**Figure S1.** Urea synthesis from ammonium carbamate catalyzed by organic bases.

Experimental conditions: Base (0.38 mmol), ammonium carbamate (3.8 mmol), 140 °C, 24 h, in 1 mL of NMP. Pressure of the inside of the vessel was increased up to 0.48 MPa because of autogenous pressure of thermal decomposition of ammonium carbamate. The amount of produced urea was determined by the Fehon reaction.

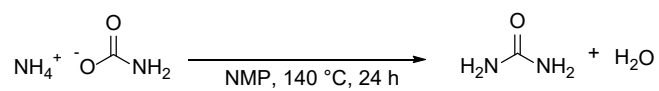

| Entry | Solvent     | Relative dielectric constant | Yield (%) |
|-------|-------------|------------------------------|-----------|
| 1     | -           | -                            | 0         |
| 2     | DMSO        | 46.5                         | 1         |
| 3     | MeCN        | 35.9                         | 0         |
| 4     | NMP         | 32.2                         | 0         |
| 5     | THF         | 7.6                          | 0         |
| 6     | Toluene     | 2.4                          | 0         |
| 10    | 1,4-dioxane | 2.2                          | 0         |

**Figure S2.** Urea synthesis from ammonium carbamate without base.

Experimental conditions: Ammonium carbamate (3.6 mmol), 140 °C, 5 atm, 24 h, in 1 mL of solvent.

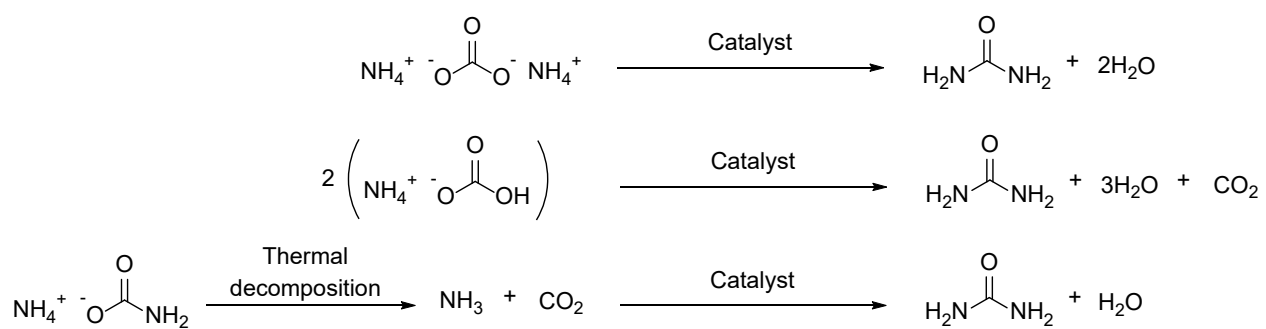

**Figure S3.** Substrate Scope.

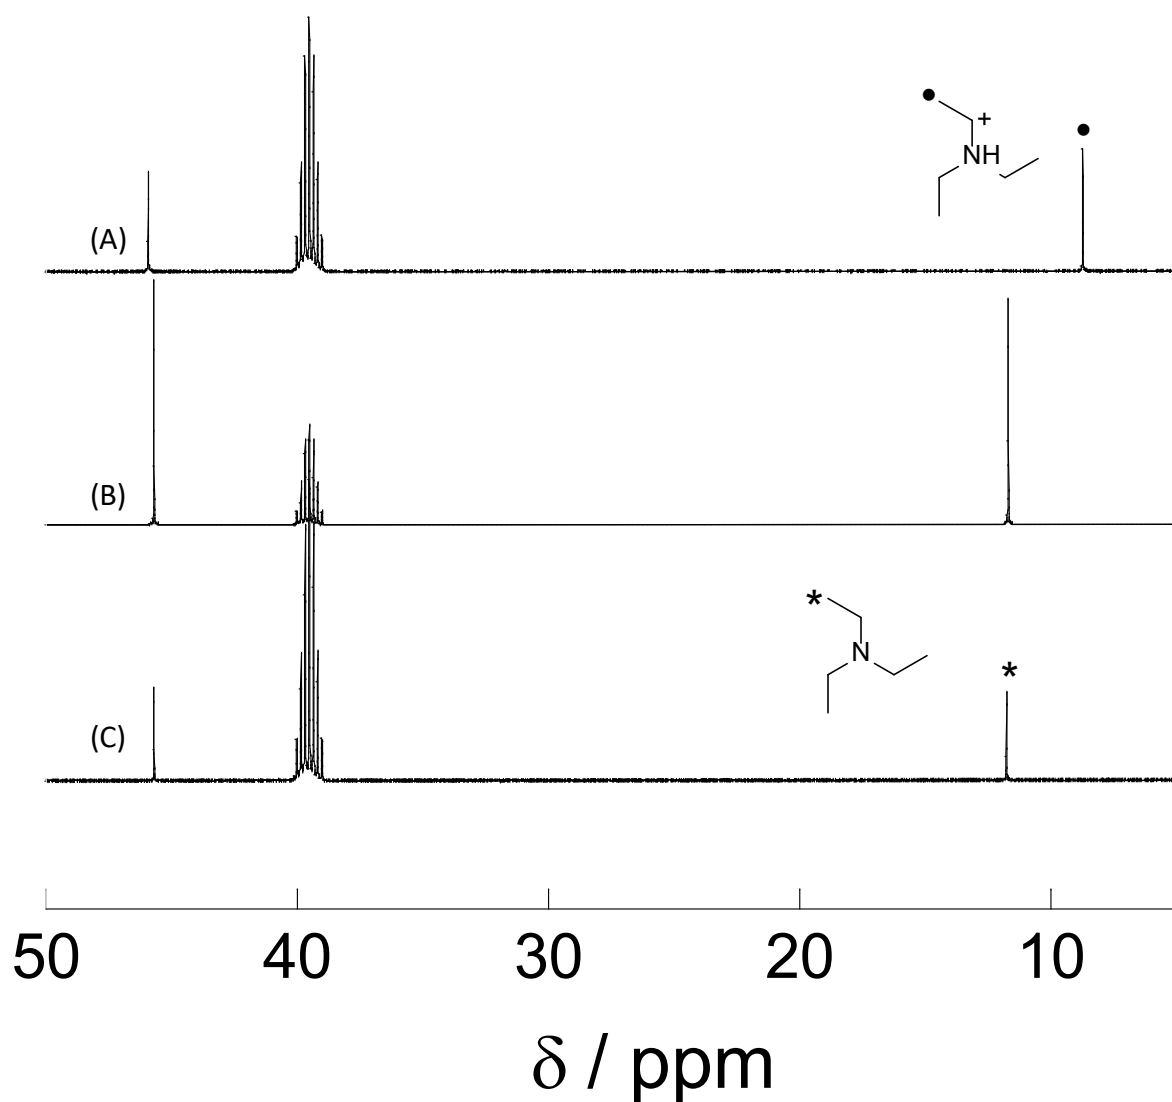

**Figure S4.**  $^{13}\text{C}$  NMR spectra in DMSO of (A) Et<sub>3</sub>N + H<sub>2</sub>SO<sub>4</sub>, (B) Et<sub>3</sub>N + ammonium carbamate, and (C) Et<sub>3</sub>N. Filled circle: primary atom of Et<sub>3</sub>NH<sup>+</sup>, Asterisk: primary carbon atom of Et<sub>3</sub>N. The signal of the carbon of protonated Et<sub>3</sub>N is observed at around 8.7 ppm.

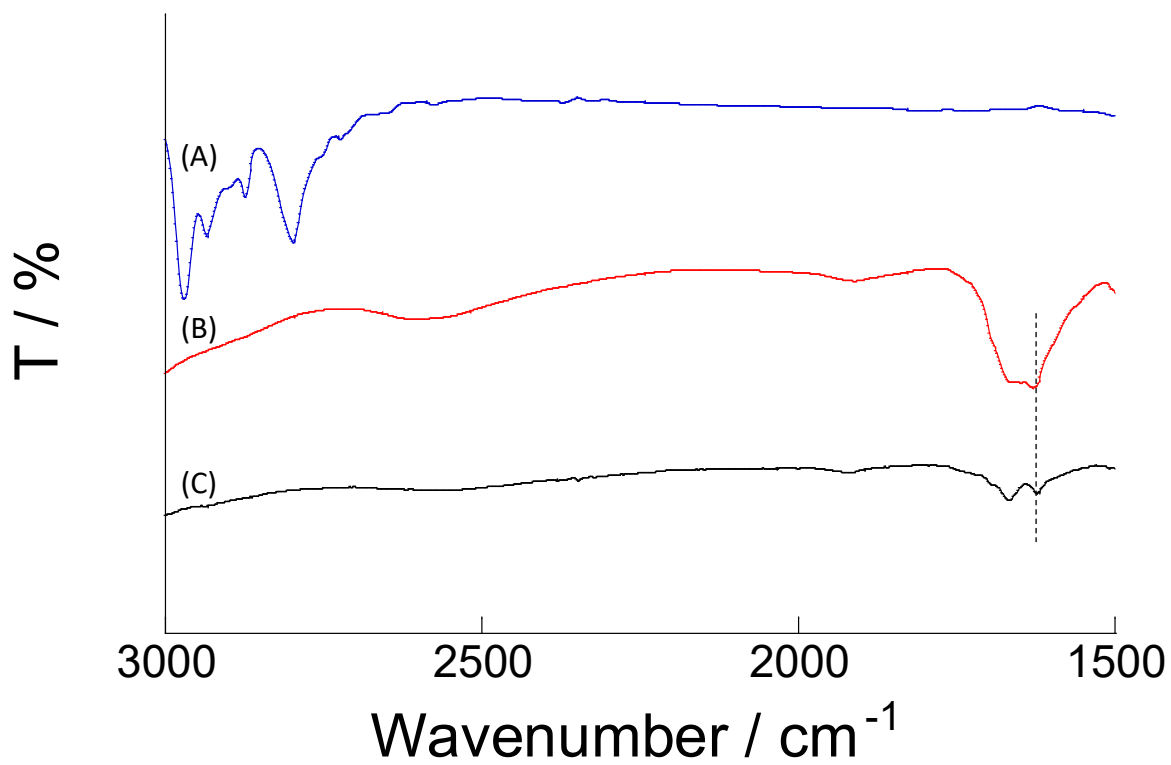

**Figure S5.** FT-IR spectra of (A) Et<sub>3</sub>N, (B) ammonium carbamate, and (C) Et<sub>3</sub>N + ammonium carbamate. Dashed line: C=O stretch of carbamate anion.

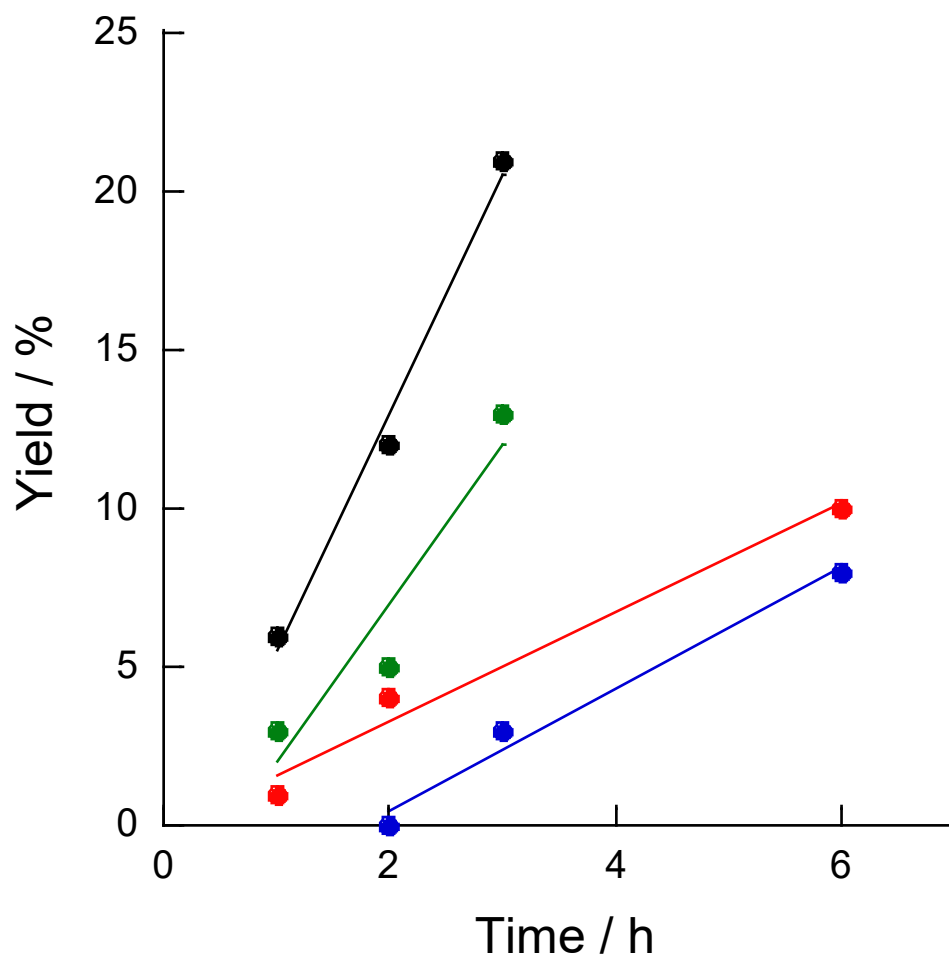

**Figure S6.** Urea synthesis results under various temperature as a function of time.

Experimental conditions: DBU (0.36 mol), ammonium carbamate (3.6 mol), 5 atm, in 1 mL of DMSO. Black (140 °C), Green (130 °C), Red (120 °C), Blue (110 °C).

| Entry | Reaction temperature | Slope (%/h) | $v_0$ (mol/(L*h)) | $\ln(v_0)$ |
|-------|----------------------|-------------|-------------------|------------|
| 1     | 110 °C               | 1.96        | 0.775             | -2.56      |
| 2     | 120 °C               | 3.70        | 0.142             | -1.95      |
| 3     | 130 °C               | 5.30        | 0.198             | -1.62      |
| 4     | 140 °C               | 7.47        | 0.272             | -1.30      |

**Figure S7.** Urea synthesis results under various temperature.
